# Supplementary material for: Subcutaneous Biological Treatments for Moderate to Severe Psoriasis: Interpreting Safety Data by Network Meta-Analysis
Source: PubMed Central journal article supplement — Drugs Real World Outcomes. 2015 Jan 8;2(1):23–7. doi: 10.1007/s40801-014-0006-1 (PMC4883196; doi:10.1007/s40801-014-0006-1), 2015-01-08
Supplement: 40801_2014_6_MOESM1_ESM.pdf [file 40801_2014_6_MOESM1_ESM.pdf]

**Figure S1. Prisma schematic.**

The figure summarizes the phases of our literature search and their respective results.

**Table S1. Incidence of any serious AE.**

| <b>Study No.</b> | <b>First author</b> | <b>Any serious AE</b> | <b>Total number of patients</b> | <b>Treatment</b> | <b>Follow-up</b> |
|------------------|---------------------|-----------------------|---------------------------------|------------------|------------------|
| 1                | Gordon [12]         | 0                     | 52                              | Placebo          | at week 12       |
| 1                | Gordon [12]         | 1                     | 45                              | Adalimumab       |                  |
| 2                | Asahina [11]        | 2                     | 46                              | Placebo          | at week 24       |
| 2                | Asahina [11]        | 3                     | 43                              | Adalimumab       |                  |
| 3                | Menter [13]         | 3                     | 398                             | Placebo          | at week 16       |
| 3                | Menter [13]         | 10                    | 814                             | Adalimumab       |                  |
| 4                | Igarashi [16]       | 2                     | 32                              | Placebo          | at week 12       |
| 4                | Igarashi [16]       | 0                     | 64                              | Ustekinumab 45mg |                  |
| 4                | Igarashi [16]       | 3                     | 62                              | Ustekinumab 90mg |                  |
| 5                | Papp 2008 [15]      | 8                     | 410                             | Placebo          | at week 12       |
| 5                | Papp 2008 [15]      | 8                     | 409                             | Ustekinumab 45mg |                  |
| 5                | Papp 2008 [15]      | 5                     | 411                             | Ustekinumab 90mg |                  |
| 6                | Leonardi [18]       | 2                     | 255                             | Placebo          | at week 12       |
| 6                | Leonardi [18]       | 2                     | 255                             | Ustekinumab 45mg |                  |
| 6                | Leonardi [18]       | 4                     | 255                             | Ustekinumab 90mg |                  |
| 7                | Tsai [17]           | 1                     | 60                              | Placebo          | at week 12       |
| 7                | Tsai [17]           | 0                     | 61                              | Ustekinumab 45mg |                  |
| 8                | Zhu [14]            | 1                     | 161                             | Placebo          | at week 12       |
| 8                | Zhu [14]            | 1                     | 160                             | Ustekinumab 45mg |                  |
| 9                | Tyring [22]         | 3                     | 306                             | Placebo          | at week 12       |
| 9                | Tyring [22]         | 6                     | 312                             | HDE              |                  |
| 10               | Griffiths [23]      | 4                     | 137                             | HDE              | at week 12       |
| 10               | Griffiths [23]      | 4                     | 209                             | Ustekinumab 45mg |                  |
| 10               | Griffiths [23]      | 4                     | 347                             | Ustekinumab 90mg |                  |

Abbreviations: AE, adverse event; HDE, high-dose etanercept.

**Table S2. Incidence of any infectious AE.**

| <b>Study No.</b> | <b>First author</b> | <b>Any infectious AE</b> | <b>Total number of patients</b> | <b>Treatment</b> | <b>Follow-up</b> |
|------------------|---------------------|--------------------------|---------------------------------|------------------|------------------|
| 1                | Menter [13]         | 89                       | 398                             | Placebo          | at week 16       |
| 1                | Menter [13]         | 235                      | 814                             | Adalimumab       |                  |
| 2                | Asahina [11]        | 23                       | 46                              | Placebo          | at week 24       |
| 2                | Asashina [11]       | 18                       | 43                              | Adalimumab       |                  |
| 3                | Papp [15]           | 82                       | 410                             | Placebo          | at week 12       |
| 3                | Papp [15]           | 88                       | 409                             | Ustekinumab 45mg |                  |
| 3                | Papp [15]           | 92                       | 411                             | Ustekinumab 90mg |                  |
| 4                | Igarashi [16]       | 6                        | 32                              | Placebo          | at week 12       |
| 4                | Igarashi [15]       | 13                       | 64                              | Ustekinumab 45mg |                  |
| 4                | Igarashi [15]       | 15                       | 62                              | Ustekinumab 90mg |                  |
| 5                | Leonardi [18]       | 68                       | 255                             | Placebo          | at week 12       |
| 5                | Leonardi [18]       | 80                       | 255                             | Ustekinumab 45mg |                  |
| 5                | Leonardi [18]       | 66                       | 255                             | Ustekinumab 90mg |                  |
| 6                | Tsai [17]           | 14                       | 60                              | Placebo          | at week 12       |
| 6                | Tsai [17]           | 20                       | 61                              | Ustekinumab 45mg |                  |
| 7                | Zhu [14]            | 47                       | 161                             | Placebo          | at week 12       |
| 7                | Zhu [14]            | 58                       | 160                             | Ustekinumab 45mg |                  |
| 8                | Tyring [22]         | 71                       | 306                             | Placebo          | at week 12       |
| 8                | Tyring [22]         | 87                       | 312                             | HDE              |                  |
| 9                | Papp [21]           | 25                       | 193                             | Placebo          | at week 12       |
| 9                | Papp [21]           | 26                       | 196                             | LDE              |                  |
| 9                | Papp [21]           | 75                       | 194                             | HDE              |                  |
| 10               | Leonardi [20]       | 19                       | 166                             | Placebo          | at week 12       |
| 10               | Leonardi [20]       | 16                       | 160                             | LDE              |                  |
| 10               | Leonardi [20]       | 9                        | 164                             | HDE              |                  |
| 11               | Van de Kerkhof [19] | 12                       | 46                              | Placebo          | at week 24       |
| 11               | Van de Kerkhof [19] | 17                       | 96                              | HDE              |                  |

Abbreviations: AE, adverse event; HDE, high-dose etanercept; LDE, low-dose etanercept.

**Table S3. Any serious AE: results of Bayesian network meta-analysis for both direct and indirect comparisons.**

| Pairwise comparison |     | RD     | 95%CrI |       |
|---------------------|-----|--------|--------|-------|
| ADA                 | PLA | 1.632  | -0.371 | 6.007 |
| U45                 | PLA | -0.159 | -0.783 | 0.919 |
| U90                 | PLA | -0.119 | -0.784 | 1.017 |
| HDE                 | PLA | 1.357  | -0.406 | 4.874 |
| U45                 | ADA | -1.402 | -2.590 | 1.286 |
| U90                 | ADA | -1.348 | -2.581 | 1.415 |
| HDE                 | ADA | 0.621  | -2.294 | 7.620 |
| U90                 | U45 | 0.120  | -0.563 | 1.275 |
| HDE                 | U45 | 1.744  | -0.232 | 5.766 |
| HDE                 | U90 | 1.682  | -0.244 | 5.439 |

Abbreviations: CrI, credible interval; AE, adverse events; PLA, placebo; ADA, adalimumab; U45, ustekinumab 45 mg;

U90, ustekinumab 90 mg; HDE, high-dose etanercept.

**Table S4. Results of the Bayesian network meta-analysis for both direct and indirect comparisons for the end-point of any infectious AE.**

| Pairwise comparison |     | RD      | 95%CrI  |        |
|---------------------|-----|---------|---------|--------|
| ADA                 | PLA | 5.368   | 0.359   | 10.729 |
| U45                 | PLA | 3.803   | -0.162  | 7.844  |
| U90                 | PLA | 2.168   | -2.042  | 6.597  |
| HDE                 | PLA | 8.172   | 2.859   | 13.670 |
| LDE                 | PLA | -4.332  | -9.752  | 1.842  |
| U45                 | ADA | -1.229  | -7.434  | 5.323  |
| U90                 | ADA | -2.870  | -9.091  | 3.947  |
| HDE                 | ADA | 3.174   | -4.353  | 10.997 |
| LDE                 | ADA | -9.435  | -15.848 | -1.840 |
| U90                 | U45 | -1.526  | -5.678  | 2.871  |
| HDE                 | U45 | 4.614   | -2.250  | 11.788 |
| LDE                 | U45 | -7.962  | -14.091 | -0.934 |
| HDE                 | U90 | 6.301   | -0.888  | 13.818 |
| LDE                 | U90 | -6.289  | -12.590 | 0.995  |
| LDE                 | HDE | -12.393 | -17.664 | -6.398 |

Abbreviations: CrI, credible interval; AE, adverse event; PLA, placebo; ADA, adalimumab; U45, ustekinumab 45 mg; U90, ustekinumab 90 mg; HDE, high-dose etanercept; LDE low-dose etanercept.
